# Supplementary material for: Comparison of GFR estimation in patients with diabetes mellitus using the EKFC and CKD-EPI equations
Source: Springer Nature journal article supplement (doi:10.1007/s40620-024-02202-4), 2025-01-10

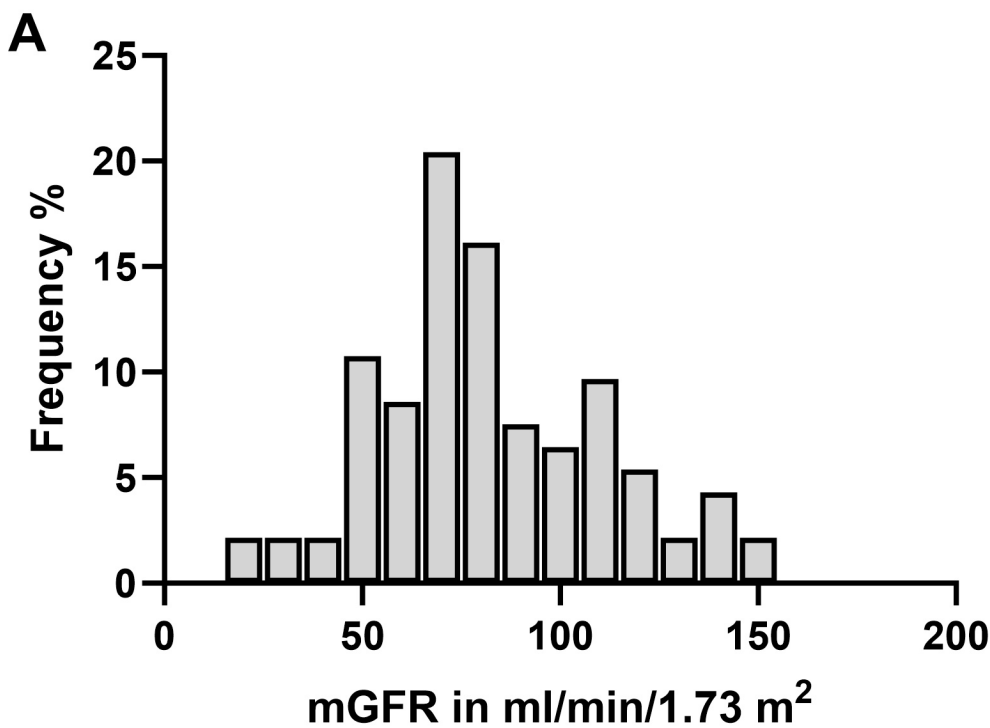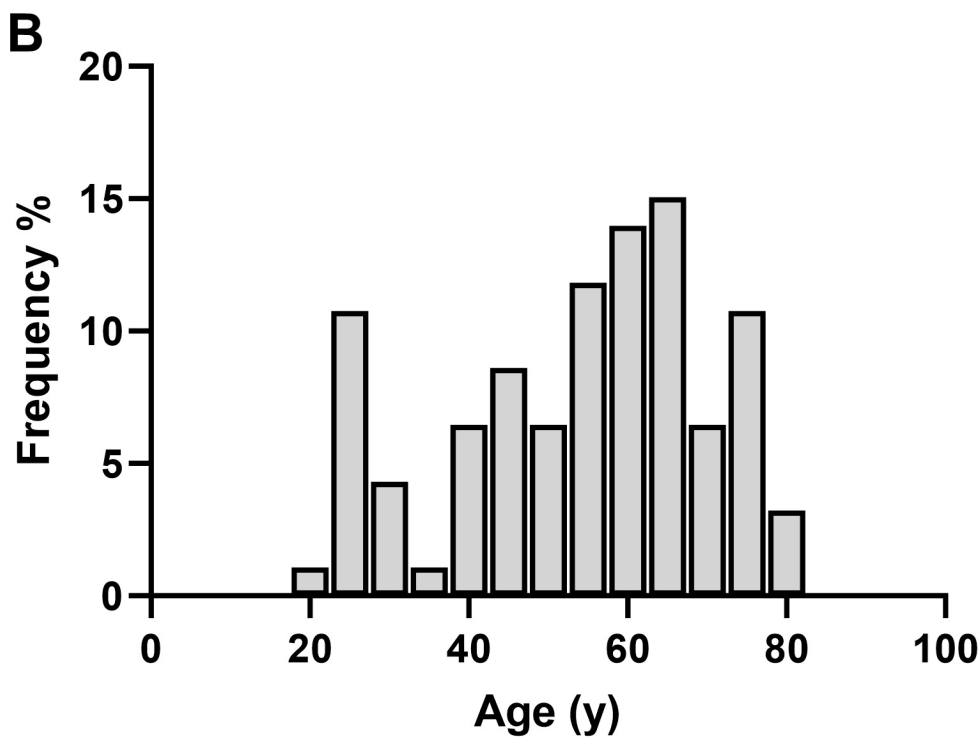

Supplement: MOESM3 [file 40620_2024_2202_MOESM3_ESM.pdf › 40620_2024_2202_MOESM3_ESM.pdf]
